# Supplementary material for: In Vivo Anti-Inflammation Potential of Aster koraiensis Extract for Dry Eye Syndrome by the Protection of Ocular Surface
Source: PubMed Central journal article supplement (PMC7690718; doi:10.3390/nu12113245), 2020-10-23
Supplement: nutrients-12-03245-s001.pdf [file nutrients-12-03245-s001.pdf]

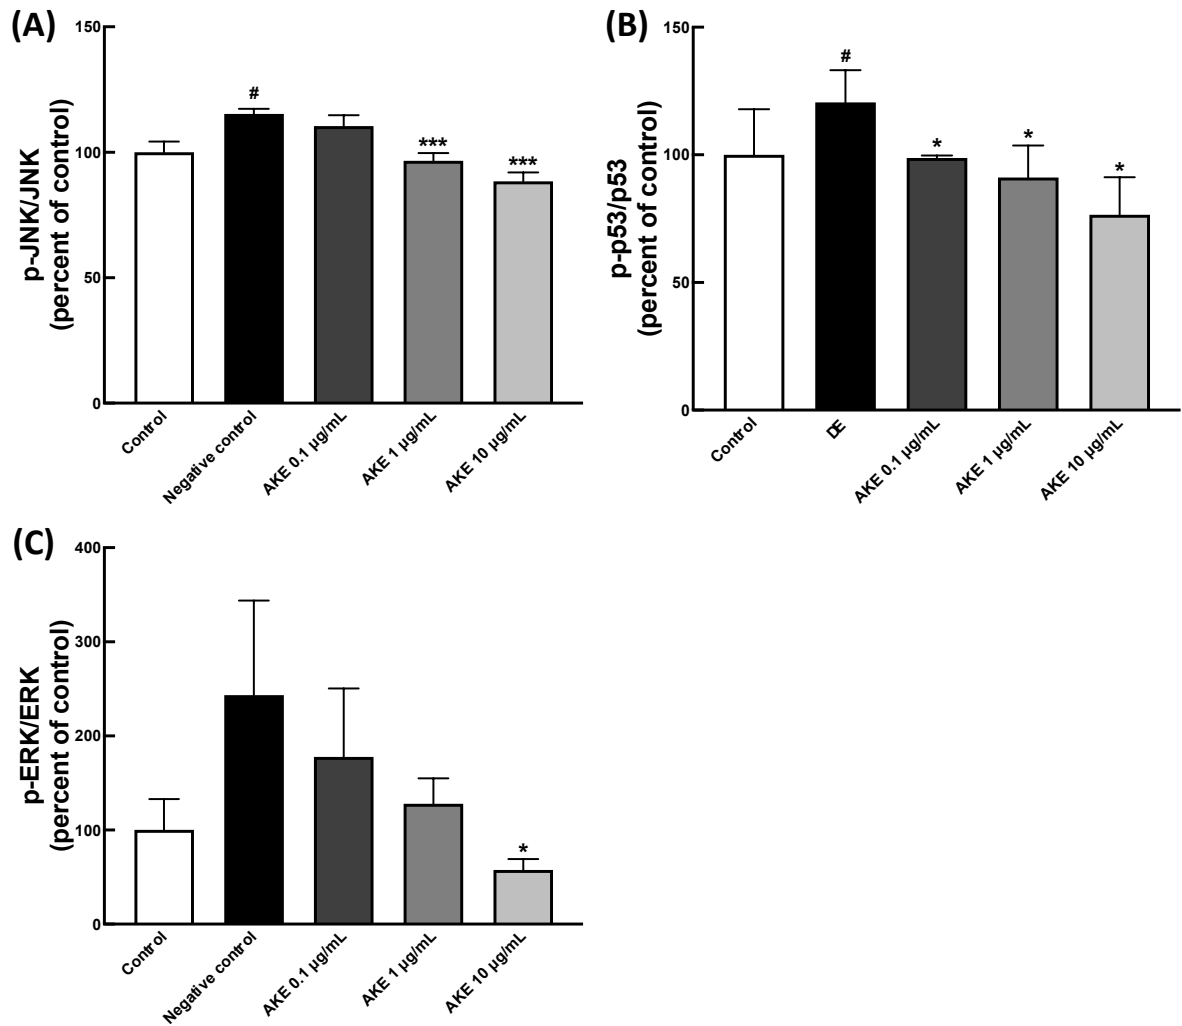

**Supplement figure 1.** The intracellular inflammatory signaling (MAPK) was analyzed using western blot (WB) with specific antibodies such as p-JNK/JNK (A), p-P38/P38 (B), and p-ERK/ERK (C). Data from three independent experiments have been presented as bar graphs showing mean  $\pm$  SD. #  $p < 0.05$  versus CON; \*  $p < 0.05$ , \*\*\*  $p < 0.001$  versus DE.
